# Supplementary material for: Biogenic synthesis of a green tea stabilized PPy/SWCNT/CdS nanocomposite and its substantial applications, photocatalytic degradation and rheological behavior
Source: Royal Society of Chemistry journal article supplement (doi:10.1039/d0na00029a), 2020-01-01
Supplement: d0na00029a1.pdf [file d0na00029a1.pdf]

**Biogenic Synthesis of Green tea stabilized Ppy/SWCNT/CdS  
Nanocomposite, and its Affluent Applications; Photo catalytic  
degradation and Rheological behavior.**

Yashfeen Khan<sup>a</sup>, Anees Ahmad<sup>a\*</sup>, Nafees Ahmad<sup>a</sup>, Faraz Rasheed Mir<sup>b</sup> and Gerhard Schories<sup>b</sup>

*<sup>a</sup>Department of Chemistry, Faculty of Sciences, Aligarh Muslim University,  
Aligarh.*

*202 002, Uttar Pradesh, India.*

*<sup>b</sup>Technologie Transfer Zentrum (ttz) Am Lunedeich 12, 27576 Bremerhaven,  
Germany.*

*Email: [ykhan101@myamu.ac.in](mailto:ykhan101@myamu.ac.in) (Y.Khan), [aneesahmadchem@gmail.com](mailto:aneesahmadchem@gmail.com) (A. Ahmad),  
[siddiquenafees123@gmail.com](mailto:siddiquenafees123@gmail.com) (N.Ahmad), [gschories@ttz-bremerhaven.de](mailto:gschories@ttz-bremerhaven.de) (G.  
Schories), and [frasheedmir@ttz-bremerhaven.de](mailto:frasheedmir@ttz-bremerhaven.de) (F.R. Mir)  
Tel: 9568767909 (Y.Khan), +4917684023445 (F.R.Mir)*

**Table S1.** Account of Recently Published Works on Photo catalytic degradation Of Nanocomposites with Different Organic Pollutants

| Nanocomposite                                                       | Model pollutant                    | Light source               | Wavelength (nm) | Reference |
|---------------------------------------------------------------------|------------------------------------|----------------------------|-----------------|-----------|
| TiO <sub>2</sub> /MWCNT<br>CdS/MWCNT<br>TiO <sub>2</sub> /CdS/MWCNT | Methylene Blue                     | 96W UV lamp                | -               | 1         |
| CNT/ZnO/TiO <sub>2</sub>                                            | AO 7                               | UVP Pen Ray lamp           | -               | 2         |
| CNT/gold nanoparticles                                              | Methylene Blue                     | UV lamp                    | 254             | 3         |
| Magnetic CNT/TiO <sub>2</sub>                                       | Carbamazepine and sulfamethoxazole | Xenon short arc lamp (80W) | 254             | 4         |
| Zn-CNT/O <sub>2</sub>                                               | 4-chlorophenol                     | UV-vis lamp                | 385             | 5         |
| TiO <sub>2</sub> /SWCNT                                             | Rhodamine B and Nitrobenzene       | 20W UV-vis lamp            | 365             | 6         |
| Polypyrrole/CdS                                                     | Methylene Blue                     | 500W Xenon lamp            | 664             | 7         |
| Ag doped CdS/MWCNT                                                  | Crystal violet                     | 125W UV lamp               | 365             | 8         |
| Cu <sub>2</sub> O/polypyrrole                                       | Methyl orange                      | 500W Xenon lamp            | 464             | 9         |
| FeS <sub>2</sub> -SnO <sub>2</sub> /MWCNT                           | Methyl orange                      | 11W Mercury lamp           | 254             | 10        |

**Table S2.** Summary of the Recently Published Literature On Rheological Properties of Oil Based Nanofluid

| Nanofluid               | Temp. °C  | Shear rate (s <sup>-1</sup> ) | Rheological Behavior | % Viscosity Change | Base fluid   | Reference |
|-------------------------|-----------|-------------------------------|----------------------|--------------------|--------------|-----------|
| TiO <sub>2</sub> /MWCNT | 50        | 0-700                         | Non-Newtonian        | 42%                | 5W50         | 11        |
| MWCNT/TiO <sub>2</sub>  | 25 and 50 | 666.5- 13,330                 | Non-Newtonian        | -                  | SAE 50       | 12        |
| MWCNT/ZnO               | 5-55      | 6331                          | Newtonian            | -                  | 5W50         | 13        |
| MWCNT(COOH)             | 25-50     | 670-8700                      | Non-Newtonian        | 75% drop           | SAE 50       | 14        |
| MgO<br>MWCNT/CuO        | 25-50     | 50666.5-9331                  | Non-Newtonian        | 29.47%             | SAE-40       | 15        |
| MWCNT-MgO               | 25-50     | 0-1200                        | Non-Newtonian        | -                  | SAE40        | 16        |
| ZnO–MWCNTs              | 5–55      | --                            | Newtonian            | 85% drop           | SAE<br>10W40 | 17        |

**Comparing the present study with these previous ones, we obtain that maximum % drop in the viscosity of nanofluid is reported by the nanocomposite PSC with base fluid Castrol class: 15W 40.**

**Table S3.** Average particle size of PSC nanocomposite

| Peak position 2θ (degree) | FWHM (Radians) | Particle Size, D(nm) | Average Particle Size, (nm) |
|---------------------------|----------------|----------------------|-----------------------------|
| 21.90002                  | 0.287          | 27.68029569          |                             |
| 25.7294                   | 23.70572       | 0.335118616          |                             |
| 25.73077                  | 6.46779        | 1.228275511          | 5.272958422                 |
| 31.0969                   | 4.81081        | 1.65132275           |                             |
| 50.09594                  | 23.89494       | 0.33245775           |                             |

## References

- 1 M. B. Askari, Z. T. Banizi, S. Soltani and M. Seifi, *Opt. Elsevier*, 2018, **157**, 230–239.
- 2 H. Bai, X. Zan, L. Zhang and D. Delai, *Sep. Purif. Technol. Elsevier*, 2015, **156**, 922–930.
- 3 V. D. Chinh, L. X. Hung, L. Di Palma, V. T. H. Hanh and G. Vilardi, *Chem. Eng. Technol.*, 2019, **42**, 308–315.
- 4 D. Awfa, M. Ateia, M. Fujii and C. Yoshimura, *J. Water Process Eng. Elsevier*, 2019, **31**, 100836.
- 5 Y. Liu, Y. Liu, Z. Yang and J. Wang, *RSC Adv.*, 2017, **7**, 49985–49994.
- 6 W. Zhou, K. Pan, Y. Qu, F. Sun, C. Tian, Z. Ren, G. Tian and H. Fu, *Chemosphere, Elsevier*, 2010, **81**, 555–561.
- 7 J. Zhao, P. Han, S. Tian, H. Shi, J. He and C. Xiao, *J. Colloid Interface Sci. Elsevier*, 2019, **557**, 94–102.
- 8 R. Hanieh, F. Alireza, A. P. Homayon and K. Elaheh, *Fullerenes, Nanotub. Carbon Nanostructures, Taylor Fr.*, 2019, **27**, 788–795.
- 9 Q. Zhao, K. Wang, J. Wang, Y. Guo, A. Yoshida, A. Abudula and G. Guan, *ACS Appl. Nano Mater.*, 2019, **2**, 2706–2712.
- 10 H. A. Kamazani, A. Feizbakhsh and E. Kono, *Fullerenes, Nanotub. Carbon Nanostructures*, 2019, **27**, 613–618.
- 11 I. M. Alarifi, A. B. Alkouh, V. Ali, H. M. Nguyen and A. Asadi, *Powder Technol.*, 2019, **355**, 157–162.
- 12 M. Hemmat Esfe, M. R. Sarmasti Emami and M. Kiannejad Amiri, *J. Therm. Anal. Calorim.*, 2019, **137**, 743–757.
- 13 M. Hemmat, A. Akbar, A. Arani and S. Esfandeh, *Appl. Therm. Eng.*, 2018, **143**, 493–506.
- 14 A. Alirezaie, S. Saedodin, M. H. Esfe and S. H. Rostamian, *J. Mol. Liq.*, 2017, **241**, 173–181.
- 15 M. A. Moghaddam and K. Motahari, *Appl. Therm. Eng.*, 2017, **123**, 1419–1433.
- 16 M. H. Esfe and S. Esfandeh, *Appl. Therm. Eng. Sci. Direct*, 2017, **131**, 1026–1033.
- 17 M. Asadi and A. Asadi, *Int. Commun. Heat Mass Transf.*, 2016, **76**, 41–45.
